# Supplementary material for: Improved Heterosis Prediction by Combining Information on DNA- and Metabolic Markers
Source: PubMed Central journal article supplement (PMC2666157; doi:10.1371/journal.pone.0005220), 2009-04-16

A

Unknown 31

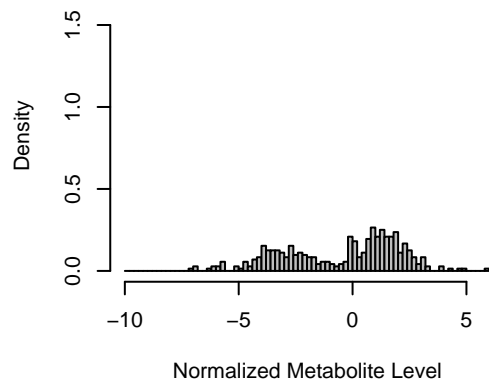

B

Cellobiose

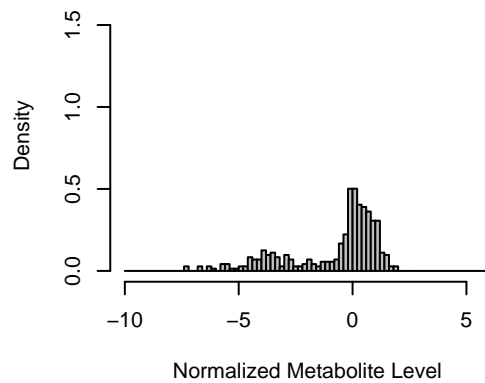

C

Alanine

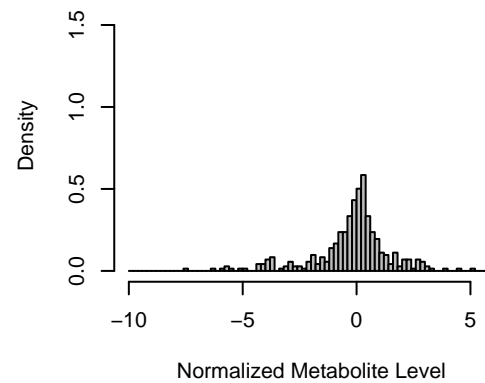

D

Oxalic Acid

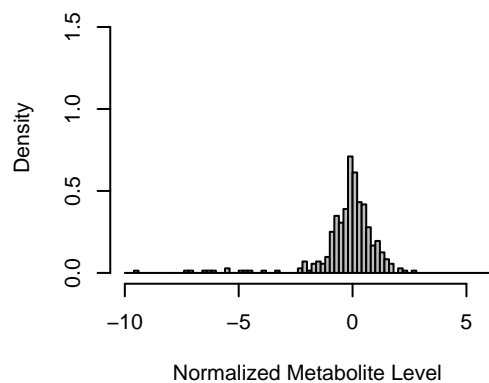

E

Unknown 74

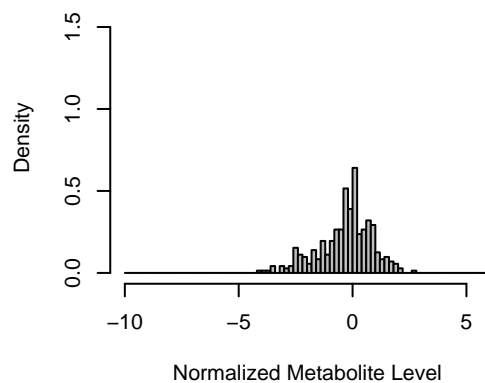

F

Unknown 88

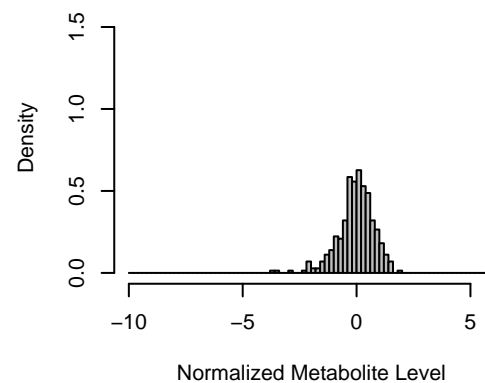

G

Unknown 81

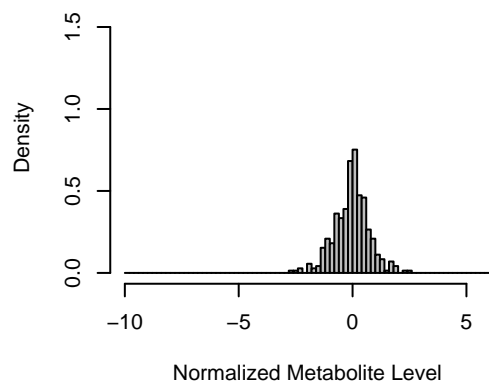

H

Suberic Acid

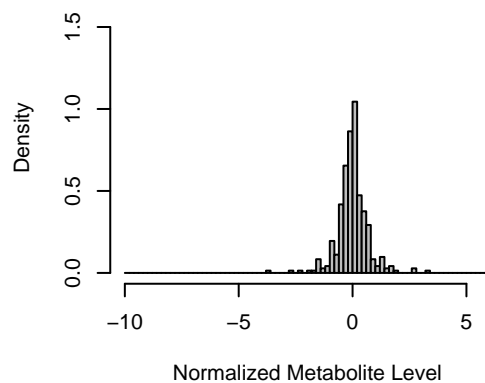

I

Glucose

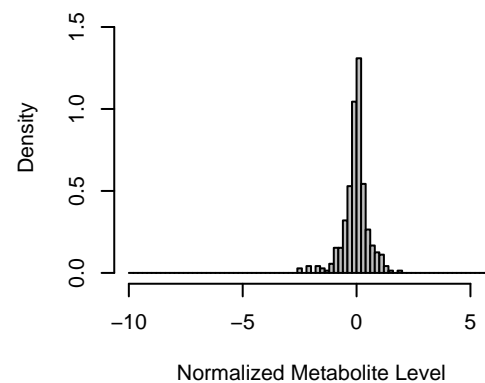

J

Erythritol

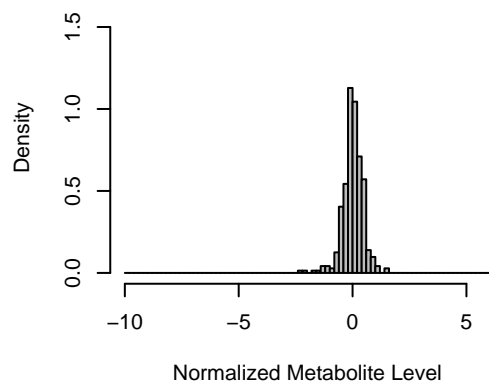

K

Unknown 61

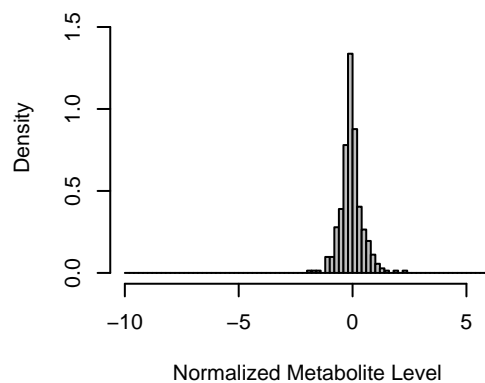

L

Random Generation:  $N(0,1/9)$ 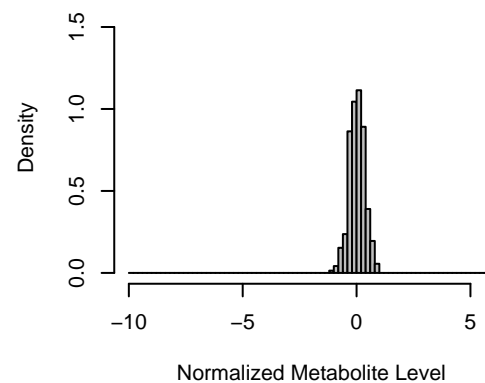

Supplement: pone.0005220.s001.pdf [file pone.0005220.s001.pdf]
