# Supplementary material for: Improved Heterosis Prediction by Combining Information on DNA- and Metabolic Markers
Source: PubMed Central journal article supplement (PMC2666157; doi:10.1371/journal.pone.0005220), 2009-04-16

A

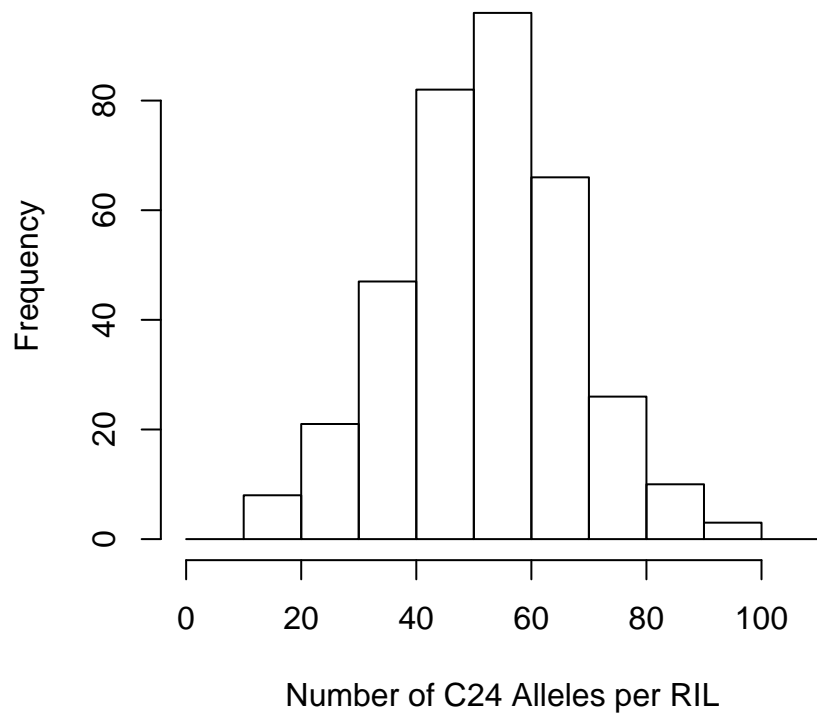

B

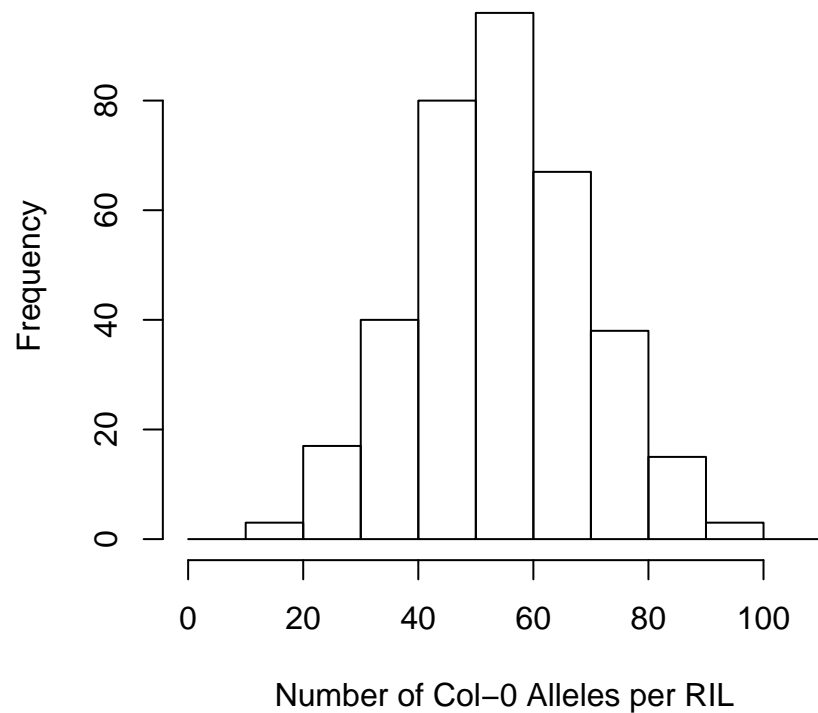

Supplement: pone.0005220.s003.pdf [file pone.0005220.s003.pdf]
