# Supplementary material for: Improved Heterosis Prediction by Combining Information on DNA- and Metabolic Markers
Source: PLoS One. 2009 Apr 16;4(4):e5220. doi: 10.1371/journal.pone.0005220 (PMC2666157; doi:10.1371/journal.pone.0005220)
Supplement: Table S4 — List of the 40 metabolic markers highly ranked in C24-heterosis prediction, sorted according to the sum of their VIP in the minimal metabolic (met) and in the minimal combined genetic-metabolic (gen-met) model. Interestingly, the three highest ranked metabolic markers are distinct from those most important for biomass per se prediction [17]. (0.02 MB XLS) [file pone.0005220.s008.xls]

## Sheet: Table S4
Rank	Metabolite name	VIP in met model	VIP in gen-met model	Sum
1	Unknown_031	2.774	3.616	6.39
2	Cellobiose	1.812	2.32	4.133
3	Alanine	1.371	2.043	3.413
4	Maleic acid	1.574	1.641	3.215
5	Unknown_004	1.194	1.716	2.91
6	Sucrose	1.262	1.379	2.641
7	Salicylic acid	1.268	1.247	2.515
8	Unknown_074	1.136	1.296	2.432
9	Unknown_088	1.02	1.232	2.252
10	Glucose-1,6-anhydro-beta-D	1.031	1.161	2.193
11	Raffinose	0.802	1.188	1.99
12	Unknown_036	0.986	0.981	1.967
13	Putrescine	0.903	0.981	1.884
14	Unknown_023	0.962	0.91	1.872
15	Unknown_041	0.825	0.955	1.78
16	Oxalic acid	0.798	0.979	1.777
17	Unknown_045	0.858	0.902	1.76
18	Urea	0.857	0.899	1.756
19	Galactose	0.808	0.887	1.695
20	Unknown_092	0.743	0.942	1.685
21	Unknown_028	0.741	0.922	1.662
22	Unknown_038	0.797	0.843	1.641
23	Unknown_008	0.596	1.036	1.631
24	Unknown_035	0.764	0.82	1.585
25	Unknown_044	0.662	0.915	1.577
26	Unknown_009	0.583	0.938	1.521
27	Unknown_079	0.704	0.81	1.514
28	Tyrosine	0.746	0.75	1.496
29	Ribonic acid	0.674	0.803	1.477
30	Propanoic acid	0.582	0.888	1.47
31	Glucose-6-phosphate	0.553	0.916	1.469
32	Maltose	0.642	0.775	1.417
33	Unknown_089	0.653	0.68	1.333
34	Glucose-1-phosphate	0.528	0.675	1.204
35	Glycine	0.609	0.568	1.177
36	Fumaric acid	0.477	0.698	1.176
37	Pelargonic acid	0	0.891	0.891
38	Ascorbic acid	0	0.867	0.867
39	Sinapic acid (trans)	0	0.85	0.85
40	Nicotinamide	0	0.85	0.85
