# Supplementary material for: Improved Heterosis Prediction by Combining Information on DNA- and Metabolic Markers
Source: PLoS One. 2009 Apr 16;4(4):e5220. doi: 10.1371/journal.pone.0005220 (PMC2666157; doi:10.1371/journal.pone.0005220)
Supplement: Table S5 — List of the 40 metabolic markers highly ranked in Col-heterosis prediction, sorted according to the sum of their VIP in the minimal metabolic (met) and in the minimal combined genetic-metabolic (gen-met) model. Interestingly, again the three highest ranked metabolic markers are distinct from those most important for biomass per se prediction [17]. (0.03 MB XLS) [file pone.0005220.s009.xls]

## Sheet: Table S5
Rank	Metabolite name	VIP in met model	VIP in gen-met model	Sum
1	Unknown_031	2.707	3.614	6.321
2	Cellobiose	1.95	2.608	4.557
3	Oxalic acid	1.486	1.462	2.948
4	2-4-Hydroxy butanoic acid	1.167	1.316	2.484
5	Ascorbic acid	1.081	1.241	2.322
6	Unknown_075	1.098	1.085	2.183
7	Alanine	1.249	0.92	2.169
8	Glycine	0.967	1.082	2.049
9	Urea	0.967	1.042	2.009
10	Unknown_008	0.984	0.978	1.962
11	Unknown_012	0.921	1.024	1.944
12	Unknown_074	0.79	1.131	1.921
13	Unknown_088	0.817	1.009	1.826
14	α-Tocopherol	0.83	0.978	1.808
15	Unknown_064	0.831	0.839	1.669
16	Fructose-6-phosphate	0.692	0.866	1.558
17	Unknown_092	0.669	0.879	1.548
18	Propanoic acid	0.717	0.773	1.49
19	Unknown_009	0.648	0.77	1.418
20	Glycerol-3-phosphate	0.612	0.762	1.374
21	Unknown_052	0.622	0.722	1.344
22	Gluconic acid	0.506	0.774	1.279
23	Unknown_063	0.565	0.7	1.265
24	Unknown_001	0.604	0.644	1.248
25	Unknown_046	0.565	0.666	1.231
26	Unknown_060	0.547	0.674	1.221
27	Unknown_066	0	1.205	1.205
28	Galactonic acid	0.523	0.65	1.173
29	Serine	0	0.984	0.984
30	Unknown_035	0.423	0.484	0.906
31	Unknown_091	0.388	0.484	0.872
32	Ribonic acid	0	0.853	0.853
33	Unknown_027	0	0.851	0.851
34	Unknown_020	0	0.849	0.849
35	Unknown_054	0	0.83	0.83
36	Glucose-1,6-anhydro-beta-D	0	0.823	0.823
37	Unknown_036	0	0.807	0.807
38	Citric acid	0	0.77	0.77
39	Ribose	0	0.763	0.763
40	Unknown_068	0	0.75	0.75
