# Supplementary material for: Improved Heterosis Prediction by Combining Information on DNA- and Metabolic Markers
Source: PLoS One. 2009 Apr 16;4(4):e5220. doi: 10.1371/journal.pone.0005220 (PMC2666157; doi:10.1371/journal.pone.0005220)
Supplement: Table S6 — Dry weight (DW) and rMPH values for the 359 investigated RILs and the corresponding testcrosses (TC-C24 and TC-Col), including the standard deviation (sd) and the arithmetic mean (mean) for each column. (0.10 MB XLS) [file pone.0005220.s010.xls]

## Sheet: Table S6
Line	DW_RIL	DW_TC-C24	DW_TC-Col	rMPH_C24	rMPH_Col
Q001	1.057	2.006	1.552	0.727821	0.343141
Q003	0.705	1.416	1.451	0.437563	0.481368
Q004	0.835	1.545	1.173	0.471429	0.123025
Q005	1.353	1.56	1.604	0.191749	0.230533
Q006	0.8	1.57	1.209	0.520581	0.177215
Q008	1.02	1.494	1.293	0.307659	0.137203
Q009	1.481	1.469	1.207	0.0699199	-0.117367
Q010	1.054	1.627	1.633	0.403191	0.415078
Q011	0.955	1.742	1.783	0.569369	0.614305
Q012	1.019	1.628	1.764	0.425569	0.552134
Q013	0.982	1.716	1.784	0.52737	0.595707
Q014	1.207	1.509	1.55	0.220874	0.259651
Q015	1.16	1.926	2.248	0.588454	0.862469
Q016	1.231	1.655	1.173	0.326122	-0.0559356
Q017	0.943	1.602	1.675	0.451087	0.524807
Q018	0.8	1.603	1.6	0.552542	0.557936
Q020	1.285	1.641	1.299	0.287059	0.0232375
Q023	0.835	1.653	1.872	0.574286	0.792245
Q024	1.285	1.348	1.19	0.0572549	-0.0626231
Q026	0.846	1.745	1.878	0.653245	0.788571
Q028	0.855	1.726	1.357	0.628302	0.286866
Q029	1.115	1.783	2.165	0.498319	0.827775
Q030	1.38	1.77	1.437	0.338374	0.0911162
Q031	0.8	1.702	1.535	0.648426	0.494645
Q032	1.157	1.719	1.157	0.419488	-0.0402323
Q033	1.099	1.512	1.477	0.279188	0.255419
Q034	0.908	1.429	1.638	0.315232	0.515264
Q036	0.988	1.69	1.816	0.500222	0.619982
Q038	1.233	1.558	1.336	0.247398	0.0743868
Q039	0.899	1.63	1.829	0.50647	0.699025
Q041	0.948	1.781	1.592	0.60958	0.445958
Q042	1.164	1.725	1.703	0.420338	0.408602
Q043	0.83	1.644	1.864	0.569451	0.788868
Q044	1.337	1.652	1.754	0.269792	0.353917
Q045	1.146	1.569	1.714	0.301535	0.428333
Q046	1.181	1.757	1.648	0.436631	0.353593
Q047	1.089	1.743	1.766	0.480884	0.507469
Q048	0.878	1.201	1.568	0.120859	0.470919
Q049	0.792	1.418	1.145	0.378707	0.119257
Q050	1.024	1.758	1.619	0.536042	0.421422
Q051	1.151	1.572	1.814	0.301325	0.508524
Q052	1.285	1.371	1.58	0.0752941	0.244584
Q053	1.075	1.904	1.575	0.62735	0.352512
Q055	0.946	1.678	1.458	0.517865	0.325455
Q056	1.179	1.474	1.35	0.206219	0.109741
Q057	0.768	1.685	1.6	0.657649	0.582591
Q058	1.021	1.734	1.376	0.51706	0.20967
Q059	1.129	1.536	1.469	0.283208	0.2329
Q060	0.948	1.471	1.673	0.329417	0.519528
Q061	0.97	1.269	1.531	0.13557	0.376799
Q062	1.12	1.903	1.772	0.595807	0.492839
Q063	1.182	1.86	1.528	0.520229	0.254516
Q064	1.095	1.721	1.871	0.458475	0.593018
Q065	0.954	1.371	1.62	0.235692	0.467391
Q066	1.156	1.716	1.98	0.417596	0.643154
Q068	1.356	1.822	2.206	0.390309	0.690421
Q069	1.035	0.792	1.627	-0.311304	0.421581
Q070	1.005	1.746	1.63	0.538326	0.443116
Q071	0.509	1.626	0.736	0.833145	-0.16506
Q072	0.927	1.877	1.738	0.712591	0.593764
Q073	1.325	1.705	2.222	0.316602	0.723149
Q074	1.209	1.348	1.46	0.0897332	0.185546
Q075	1.039	1.71	1.705	0.484375	0.487135
Q076	1.04	1.513	1.498	0.312798	0.306016
Q077	0.918	1.789	1.461	0.639029	0.345304
Q078	1.095	1.863	2.047	0.578814	0.742869
Q080	1.203	1.878	1.289	0.171451	0.386833
Q081	1.156	1.814	1.753	0.498554	0.454772
Q082	1.17	1.552	1.092	0.274743	-0.0990099
Q083	1.097	1.665	1.756	0.409822	0.493832
Q084	1.373	1.652	1.686	0.252464	0.283593
Q087	1.016	1.617	1.854	0.417799	0.63348
Q088	1.238	1.986	1.757	0.586896	0.410112
Q091	0.843	1.588	1.902	0.506641	0.81402
Q092	1.243	1.564	1.931	0.247209	0.546656
Q093	1.437	1.741	1.865	0.288675	0.386102
Q095	1.005	1.503	1.496	0.324229	0.32448
Q096	0.985	1.839	1.956	0.634667	0.747209
Q098	1.249	1.827	1.282	0.453461	0.0243708
Q099	1.48	1.478	1.648	0.076867	0.20556
Q101	1.066	1.343	1.922	0.152295	0.656897
Q104	0.866	1.524	1.399	0.430314	0.319811
Q105	1.023	1.786	1.857	0.561189	0.631094
Q106	1.053	1.695	1.967	0.462468	0.705245
Q107	1.141	1.986	1.612	0.650873	0.346138
Q108	0.969	1.383	1.349	0.238138	0.213675
Q109	1.02	1.282	1.42	0.122101	0.248901
Q110	0.98	1.474	1.363	0.31314	0.220233
Q111	0.806	1.554	1.488	0.500724	0.44466
Q113	1.124	1.694	1.936	0.380651	0.0152801
Q114	1.53	1.658	1.148	0.186404	-0.175287
Q115	0.905	1.522	1.773	0.402765	0.642427
Q116	0.955	1.771	2.115	0.595495	0.914894
Q117	1.085	1.802	1.759	0.533617	0.504062
Q119	1.251	1.971	2.019	0.46103	0.895575
Q120	0.832	1.573	1.293	0.500238	0.239693
Q121	0.952	1.503	1.682	0.355886	0.524932
Q122	0.972	1.435	2.204	0.282968	0.980234
Q124	1.224	1.773	1.815	0.424669	0.464891
Q125	1.196	1.454	1.574	0.181633	0.284898
Q126	0.86	1.611	0.673	0.516235	-0.363292
Q128	1.109	1.573	1.405	0.32519	0.189166
Q131	1.068	1.387	1.241	0.189027	0.0689061
Q132	1.189	1.395	1.52	0.136919	0.244372
Q133	1.205	1.371	1.181	0.110121	-0.0394469
Q134	0.793	1.725	1.983	0.676385	0.937469
Q135	0.962	1.725	1.481	0.549169	0.336643
Q136	1.12	1.731	1.821	0.451572	0.53412
Q137	1.368	1.705	1.963	0.295101	0.49733
Q138	1.097	1.537	1.718	0.301439	0.461506
Q139	1.298	1.698	1.823	0.32501	0.428683
Q140	1.006	1.892	1.733	0.666226	0.533628
Q141	0.853	1.604	1.439	0.514636	0.365923
Q142	0.918	1.631	1.48	0.494274	0.362799
Q143	1.249	1.519	1.327	0.208433	0.0603276
Q144	1.198	1.583	1.128	0.285424	-0.0799347
Q146	1.119	1.513	1.477	0.269295	0.244838
Q147	1.156	1.491	1.158	0.231722	-0.0390041
Q148	1.115	1.727	1.333	0.451261	0.125369
Q149	0.985	1.802	1.805	0.601778	0.612327
Q150	1.118	1.659	1.671	0.392363	0.408938
Q151	1.066	1.892	1.607	0.623338	0.385345
Q152	1.206	1.533	1.42	0.240793	0.154472
Q153	0.998	1.849	1.492	0.634114	0.325044
Q154	1.163	1.799	2.058	0.481878	0.702938
Q155	1.093	1.799	1.582	0.525869	0.348104
Q157	1.317	2.065	1.902	0.599535	0.47958
Q158	1.237	1.852	1.748	0.480416	0.403452
Q159	0.825	1.513	1.972	0.447847	0.897066
Q161	1.557	2.028	1.834	0.437279	0.304874
Q163	1.171	1.745	1.909	0.432677	0.574433
Q164	1.19	1.655	1.597	0.348269	0.306874
Q166	1.072	1.763	1.53	0.508772	0.315563
Q167	0.823	1.476	1.263	0.413793	0.216177
Q168	1.222	1.933	1.469	0.554483	0.186591
Q169	1.108	1.678	1.69	0.414244	0.430991
Q170	1.347	1.508	1.147	0.154671	-0.118032
Q171	1.131	1.302	1.23	0.0868114	0.0314465
Q172	1.185	1.43	1.621	0.167347	0.329233
Q173	0.936	1.674	1.908	0.521127	0.742466
Q174	0.98	1.613	1.022	0.436971	-0.0850492
Q175	0.792	1.51	1.375	0.468158	0.344086
Q176	0.822	1.444	1.821	0.383805	0.754335
Q177	1.422	1.604	1.589	0.193897	0.187593
Q178	0.99	1.482	1.542	0.314412	0.374332
Q179	1.097	1.617	1.212	0.369179	0.0310506
Q180	1.095	2.031	1.702	0.721186	0.449127
Q181	1.336	1.473	1.702	0.132641	0.314286
Q182	0.871	1.602	1.617	0.5	0.521882
Q183	1.172	1.613	1.655	0.323759	0.364386
Q184	0.741	1.8	1.986	0.794616	0.990977
Q185	0.879	1.339	1.113	0.249067	0.0436006
Q187	0.583	1.692	1.801	0.831169	0.960806
Q188	0.859	2	2.103	0.883239	0.990535
Q189	0.807	1.401	2.025	0.352317	0.965066
Q190	1.166	1.601	1.882	0.317153	0.555372
Q192	1.184	1.981	1.826	0.532244	0.865227
Q196	1.049	1.321	1.558	0.141746	0.353018
Q199	1.101	1.582	1.378	0.337278	0.170276
Q200	1.559	1.741	1.612	0.233003	0.146107
Q201	0.672	1.368	1.165	0.412494	0.209761
Q203	0.886	1.28	0.76	0.190144	-0.28972
Q204	1.125	1.374	1.514	0.149791	0.272804
Q205	1.395	2.035	1.603	0.530075	0.210268
Q206	1.059	1.621	1.124	0.395009	-0.028102
Q207	1.311	1.635	1.887	0.26941	0.471345
Q208	1.248	1.754	1.871	0.395941	0.495604
Q210	1.468	1.783	1.941	0.304793	0.426157
Q212	1.015	1.629	1.72	0.428947	0.516086
Q213	1.579	1.632	1.706	0.147679	0.204377
Q214	1.027	1.412	1.254	0.232112	0.0995178
Q216	1.076	1.539	1.834	0.314823	0.574249
Q217	1.499	1.693	1.91	0.225036	0.387577
Q219	0.959	1.325	1.976	0.191547	0.785811
Q220	0.735	1.515	1.366	0.515	0.373555
Q221	1.27	2.017	1.737	0.591321	0.376387
Q222	1.136	1.46	1.926	0.21616	0.611715
Q223	1.067	0.993	1.636	-0.14837	0.409737
Q224	0.912	1.147	1.346	0.0537437	0.242844
Q226	1.014	1.676	1.826	0.470821	0.610229
Q227	0.87	1.775	1.525	0.662763	0.43597
Q228	1.177	1.582	1.135	0.295659	-0.0662279
Q229	0.983	1.904	1.271	0.69395	0.136343
Q230	1.22	1.627	1.752	0.309457	0.41633
Q231	1.156	1.691	1.871	0.396943	0.552697
Q232	0.908	1.503	1.79	0.383341	0.655874
Q233	0.776	1.64	1.753	0.607055	0.727094
Q234	0.977	1.49	1.599	0.32917	0.433438
Q235	0.929	2.009	1.804	0.831358	0.652771
Q236	0.82	1.683	1.545	0.614388	0.489875
Q237	1.143	1.932	1.923	0.604651	0.604506
Q239	0.867	1.899	1.633	0.781426	0.53984
Q240	1.335	1.745	1.797	0.342308	0.388181
R003	0.876	1.791	1.384	0.67305	0.299531
R004	1.002	1.62	1.431	0.429202	0.268617
R005	0.985	1.698	1.438	0.509333	0.284502
R006	1.345	1.593	1.59	0.22069	0.223548
R007	1.544	1.533	1.66	0.0914916	0.186562
R008	1.356	1.365	1.809	0.0415872	0.386207
R010	1.407	1.724	1.808	0.290419	0.358888
R011	0.858	1.398	1.777	0.317004	0.682765
R012	0.72	1.289	1.397	0.298741	0.4154
R013	1.573	1.717	1.314	0.210007	-0.0703926
R014	1.204	1.536	1.497	0.244228	0.218063
R015	0.826	1.486	1.706	0.42133	0.640385
R016	1.022	1.678	1.679	0.467425	0.475395
R017	1.032	1.608	1.522	0.400087	0.331584
R018	1.013	1.769	1.69	0.553117	0.490957
R019	1.469	1.672	1.643	0.223116	0.206757
R021	1.096	1.858	1.534	0.573909	0.305532
R022	0.861	1.305	1.833	0.227658	0.733333
R023	1.206	1.712	1.452	0.385674	0.180488
R024	1.112	1.607	1.422	0.352125	0.202029
R025	1.024	1.777	1.761	0.552643	0.546093
R026	1.445	1.435	1.743	0.0590406	0.291589
R029	0.857	1.722	1.924	0.622997	0.822833
R031	1.016	1.424	1.751	0.248575	0.542731
R032	1.299	1.617	1.734	0.26131	0.358402
R033	0.915	1.078	1.533	-0.0110092	0.413555
R034	0.832	1.721	1.714	0.641392	0.643337
R035	0.919	1.463	1.722	0.339744	0.584906
R036	1.425	1.719	1.621	0.278067	0.210153
R037	0.937	1.608	2.058	0.46049	0.878594
R038	1.119	1.442	1.726	0.209732	0.454699
R040	1.085	1.641	1.774	0.396596	0.516888
R041	0.804	1.483	1.376	0.433543	0.337221
R042	0.972	1.278	1.774	0.142602	0.59389
R043	0.901	1.514	1.765	0.397969	0.638051
R044	1.253	1.459	1.765	0.158856	0.408057
R045	1.121	1.225	1.407	0.0268231	0.184842
R046	0.866	1.23	1.718	0.154388	0.620755
R048	0.944	1.408	1.749	0.274785	0.591447
R049	1.081	1.45	1.823	0.236147	0.561456
R050	1.374	1.614	1.65	0.223191	0.255708
R052	1.303	1.653	1.537	0.287383	0.20219
R053	0.895	1.414	2.005	0.309259	0.865984
R054	1.165	1.493	1.63	0.228807	0.347664
R055	0.91	1.432	1.656	0.316782	0.530499
R056	0.967	1.55	1.232	0.388889	0.10941
R057	1.078	1.457	1.368	0.243705	0.173242
R059	0.883	1.408	1.575	0.310987	0.474029
R060	1.343	1.295	1.563	-0.00690184	0.203697
R061	1.167	1.429	1.587	0.175164	0.311029
R063	1.02	1.464	1.752	0.2814	0.540897
R064	1.325	1.512	1.663	0.167568	0.289647
R065	0.894	1.528	1.953	0.41547	0.818436
R066	0.882	1.648	1.21	0.535165	0.132959
R067	0.915	1.505	1.955	0.380734	0.802674
R068	1.074	1.512	1.945	0.29286	0.670962
R069	0.735	1.313	1.784	0.313	0.793866
R070	0.842	1.466	1.614	0.391552	0.540076
R071	1.215	1.716	1.531	0.383871	0.240178
R072	0.968	1.681	1.515	0.505598	0.363636
R075	1.305	1.689	2.124	0.314397	0.660023
R077	0.879	1.392	1.562	0.298507	0.464604
R079	0.968	1.888	1.771	0.690999	0.594059
R081	0.985	1.916	1.511	0.703111	0.34971
R083	1.247	1.556	1.818	0.238854	0.453818
R084	1.489	1.692	2.096	0.228758	0.528254
R085	1.19	1.94	1.712	0.580448	0.400982
R086	0.745	1.524	1.798	0.516418	0.798899
R089	1.055	1.734	1.37	0.494828	0.186661
R090	0.941	1.627	1.308	0.475068	0.1918
R092	0.883	1.697	1.322	0.580074	0.237248
R095	0.854	1.273	1.383	0.20151	0.312144
R096	0.937	1.58	1.348	0.435059	0.230488
R097	1.13	1.493	1.462	0.246764	0.22651
R099	0.872	1.493	1.376	0.397286	0.29445
R100	1.087	1.4	1.337	0.190476	0.142247
R102	0.705	1.432	1.271	0.453807	0.297601
R103	1.112	1.732	1.117	0.457299	-0.0557904
R105	1.004	1.413	1.318	0.245483	0.167405
R107	0.982	1.696	1.12	0.509568	0.00178891
R108	1.23	1.679	1.289	0.345892	0.0378422
R109	0.903	1.616	1.282	0.490775	0.188688
R111	1.147	1.681	1.353	0.393864	0.12703
R112	1.117	1.603	1.292	0.345928	0.0898355
R113	2.001	1.971	1.327	0.206981	-0.184639
R114	1.052	1.373	1.276	0.185153	0.106678
R115	1.125	1.496	1.165	0.251883	-0.0205969
R116	1.014	1.54	1.51	0.35147	0.33157
R117	0.952	1.619	1.273	0.460532	0.154125
R118	1.122	1.648	1.683	0.380813	0.416667
R120	1.01	1.639	1.307	0.440879	0.154594
R121	1.084	1.577	1.177	0.342699	0.00684346
R123	0.907	1.585	1.311	0.459484	0.213327
R124	1.009	1.817	1.208	0.598065	0.0676094
R125	0.99	1.787	1.67	0.584922	0.488414
R126	0.928	1.544	1.247	0.408117	0.142988
R127	1	1.548	1.168	0.366887	0.0363798
R128	0.803	1.444	1.327	0.396518	0.290228
R131	1.063	1.12	1.548	-0.0378007	0.336211
R132	1.005	1.743	1.588	0.535683	0.405932
R133	0.658	1.472	1.55	0.530941	0.621339
R134	0.998	1.617	1.493	0.429076	0.325933
R136	1.281	1.636	1.35	0.285153	0.0650888
R138	0.631	1.2	1.271	0.265823	0.348541
R139	1.138	1.569	1.364	0.305868	0.140468
R140	0.954	1.714	1.273	0.54484	0.15308
R141	0.767	1.853	1.204	0.823819	0.191489
R142	1.129	1.587	1.387	0.325815	0.164079
R143	0.812	1.374	1.274	0.323062	0.233301
R144	0.931	1.386	1.175	0.262295	0.0755149
R145	0.974	1.365	1.465	0.219294	0.315081
R146	0.966	1.298	1.443	0.163604	0.3
R147	1.118	1.647	1.274	0.382291	0.074199
R148	0.939	1.367	1.062	0.240472	-0.0314637
R149	1.115	1.334	1.665	0.121008	0.405656
R150	1.034	1.329	1.218	0.156155	0.0646853
R151	0.913	1.812	1.432	0.663912	0.321643
R152	1.138	1.349	1.202	0.122763	0.00501672
R153	0.996	1.486	1.229	0.314463	0.0924444
R154	1.489	1.78	1.713	0.292665	0.248997
R155	0.924	1.457	1.198	0.331201	0.100092
R156	1.016	1.039	1.251	-0.0889961	0.102203
R157	1.365	1.808	1.441	0.374905	0.10042
R158	1.166	1.5	1.671	0.23406	0.380992
R159	0.864	1.404	1.505	0.318929	0.421152
R160	1.275	1.552	1.193	0.222047	-0.0565441
R161	1.086	1.608	1.748	0.367929	0.494017
R162	1.099	1.576	1.521	0.333333	0.292818
R163	1.102	1.242	1.515	0.0494297	0.286078
R164	1.223	1.628	1.39	0.308682	0.122325
R165	1.351	1.459	1.494	0.115443	0.147025
R168	1.351	2.005	1.282	0.532875	-0.015739
R169	1.247	1.927	1.39	0.534236	0.111555
R170	1.325	1.59	1.293	0.227799	0.00271423
R172	0.989	1.651	1.41	0.464951	0.257245
R173	1.465	1.652	1.268	0.210256	-0.0673042
R174	1.384	1.54	1.686	0.162703	0.278241
R176	1.497	1.75	1.483	0.267198	0.0781534
R179	1.48	1.69	1.37	0.23133	0.00219459
R183	1.239	1.426	1.351	0.138978	0.0838347
R184	1.194	1.581	1.401	0.285889	0.144608
R185	1.66	1.47	1.672	0.00512821	0.147563
R186	1.266	1.483	1.506	0.171869	0.195238
R187	1.21	1.354	1.31	0.0941414	0.0633117
R188	1.21	1.573	1.579	0.271111	0.281656
R190	1.202	1.578	1.298	0.279287	0.0570033
R194	1.259	1.504	1.779	0.191759	0.415838
R195	1.254	1.678	1.424	0.332275	0.135566
R196	1.159	1.516	1.135	0.250825	-0.0592623
R197	1.163	1.345	1.343	0.107908	0.111295
R200	1.192	1.61	1.261	0.310541	0.0310711
R201	1.42	1.518	1.651	0.130726	0.234854
R202	1.273	1.413	1.445	0.113475	0.143649
R204	1.261	1.702	1.625	0.347585	0.292247
R205	1.136	1.452	1.209	0.209496	0.0117155
R206	1.134	1.381	1.303	0.151313	0.0912898
R207	1.186	1.575	1.56	0.28519	0.278689
R208	1.071	1.566	1.262	0.340753	0.0855914
R210	1.137	1.725	1.354	0.436303	0.132581
R211	1.238	1.33	1.603	0.0627247	0.286517
R212	1.127	1.364	1.421	0.140468	0.193616
R213	1.202	1.397	1.465	0.13255	0.192997
R215	1.215	1.553	1.428	0.252419	0.156744
R216	1.189	1.516	1.347	0.235534	0.102743
R222	1.284	1.52	1.441	0.192625	0.13554
R224	1.352	1.672	1.392	0.277799	0.0683039
mean	1.08535	1.59428	1.55849	0.362057	0.341505
sd	0.202223	0.191849	0.265649	0.18145	0.251951
